# Supplementary figures and images for: A growing disadvantage of being born in an urban area? Analysing urban–rural disparities in neonatal mortality in 21 African countries with a focus on Tanzania
Source: PubMed Central journal article supplement — BMJ Glob Health. 2022 Jan 4;7(1):e007544. doi: 10.1136/bmjgh-2021-007544 (PMC8728407; doi:10.1136/bmjgh-2021-007544), 2022-01-04

S1 Appendix.

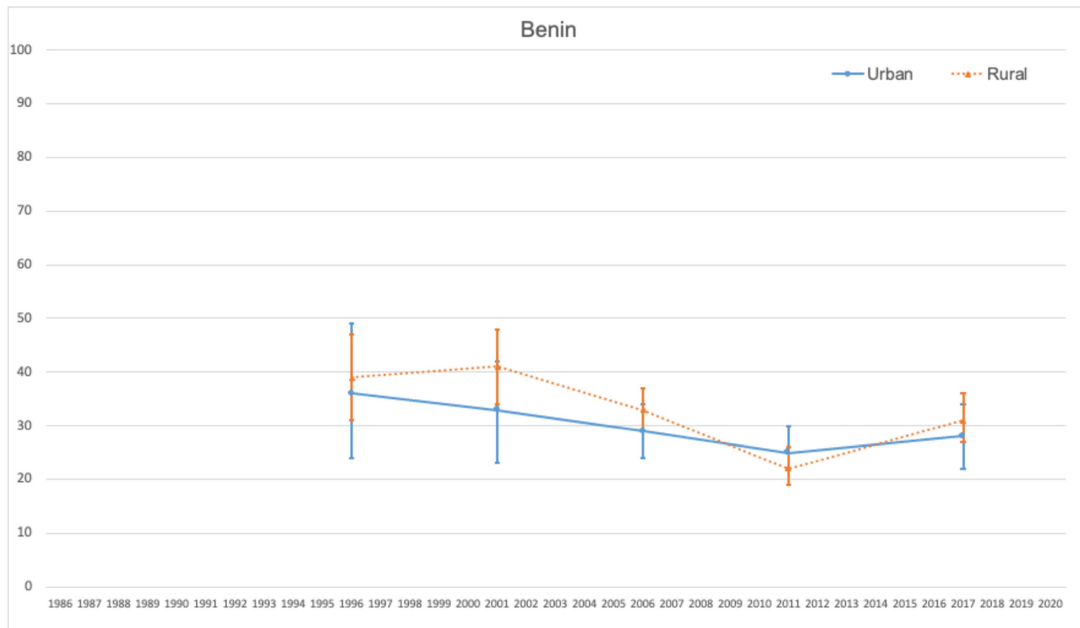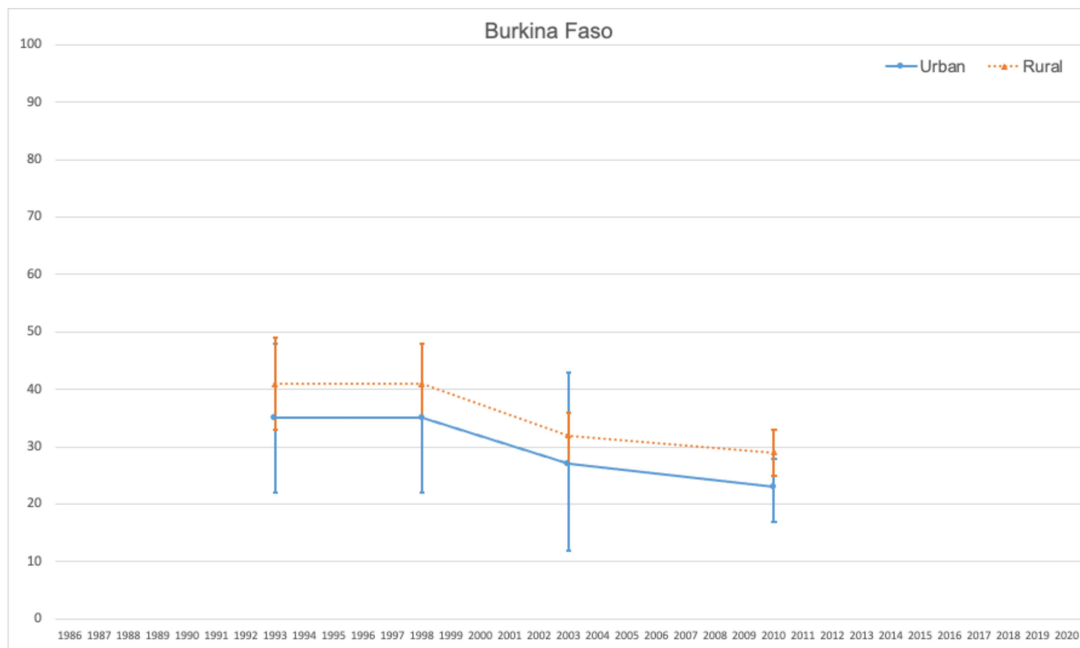

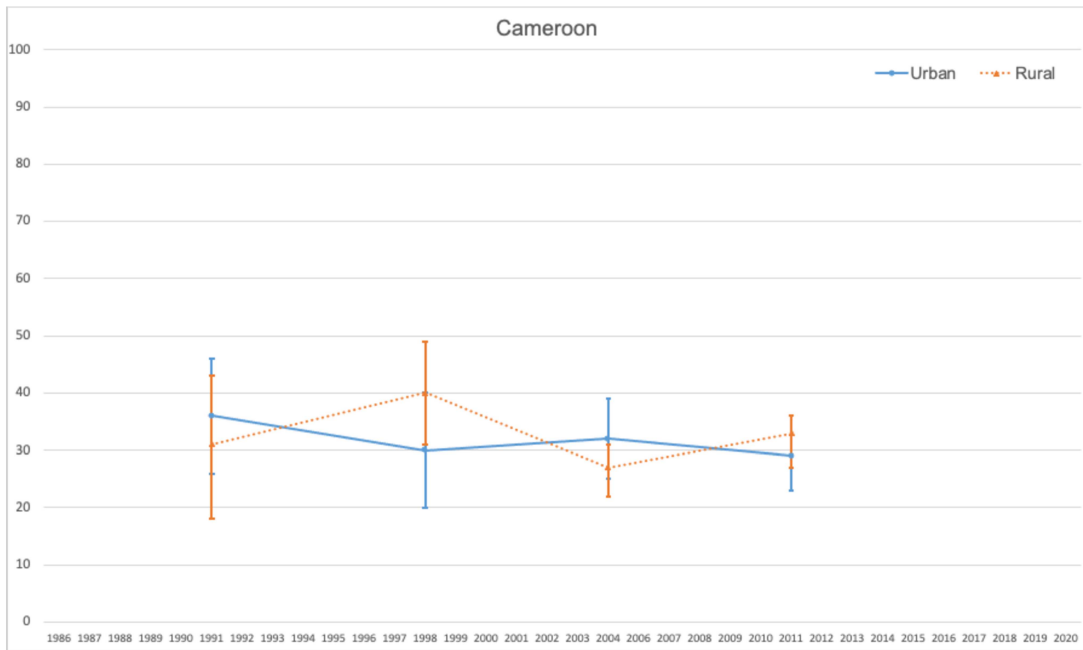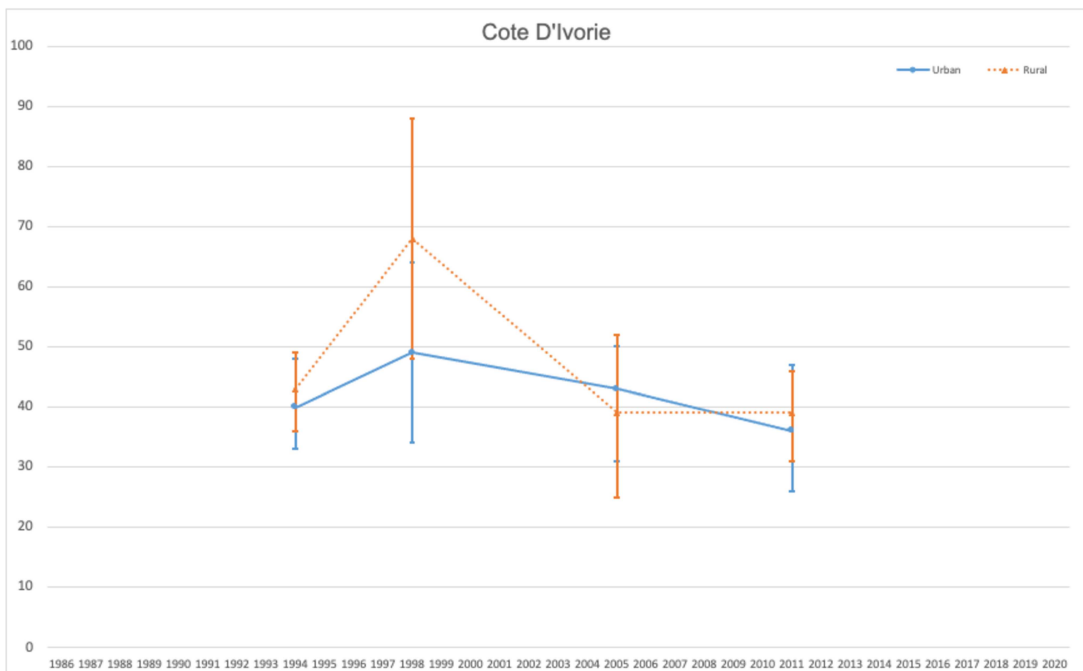

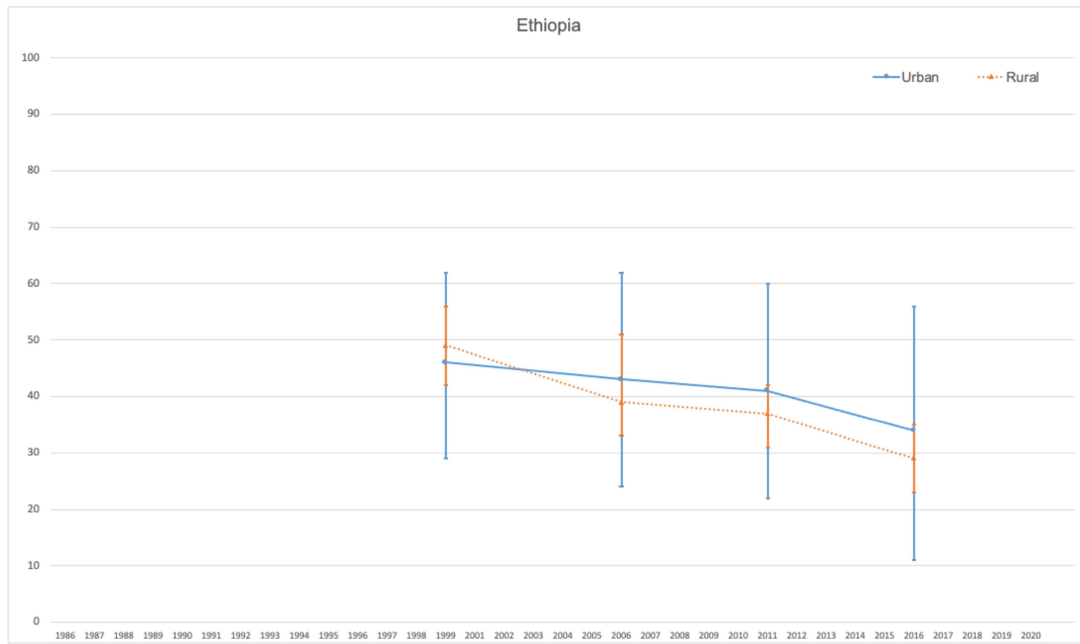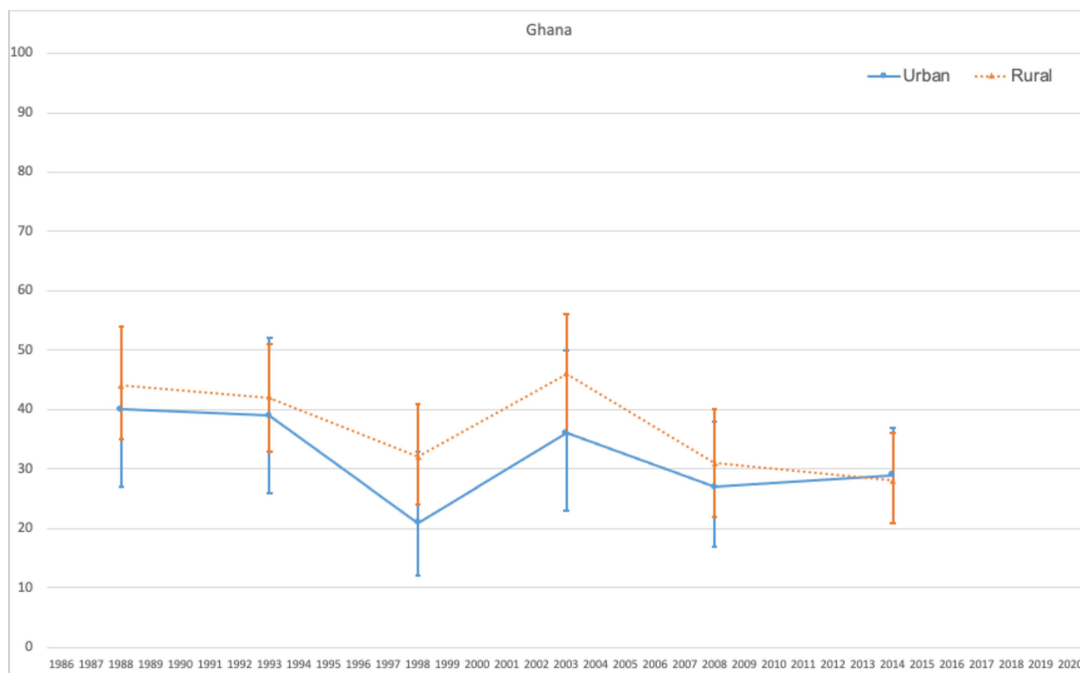

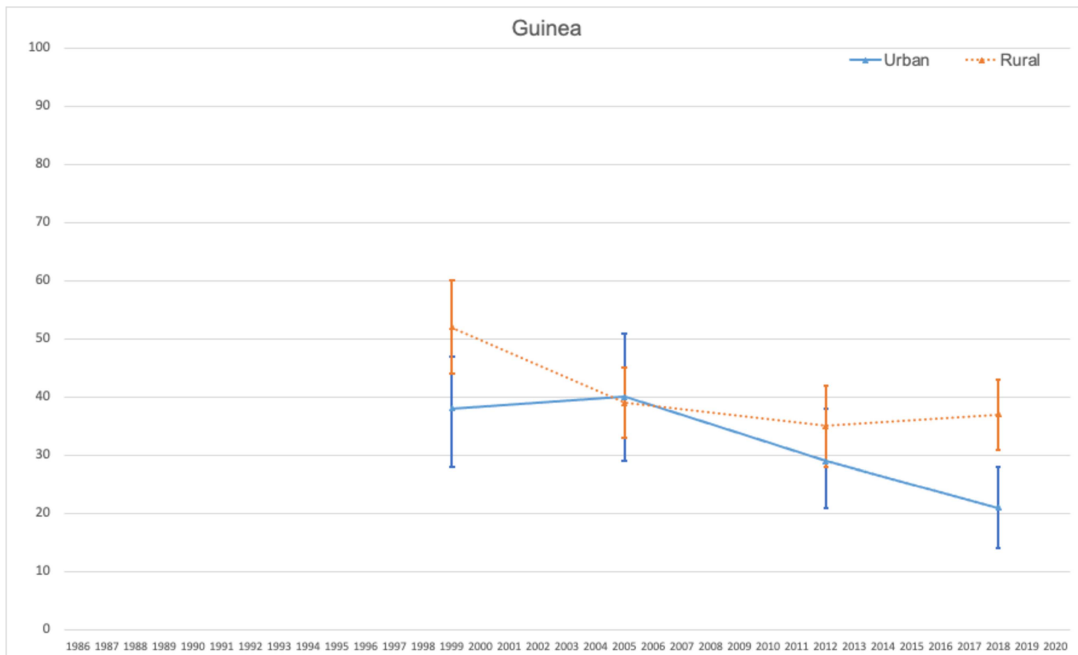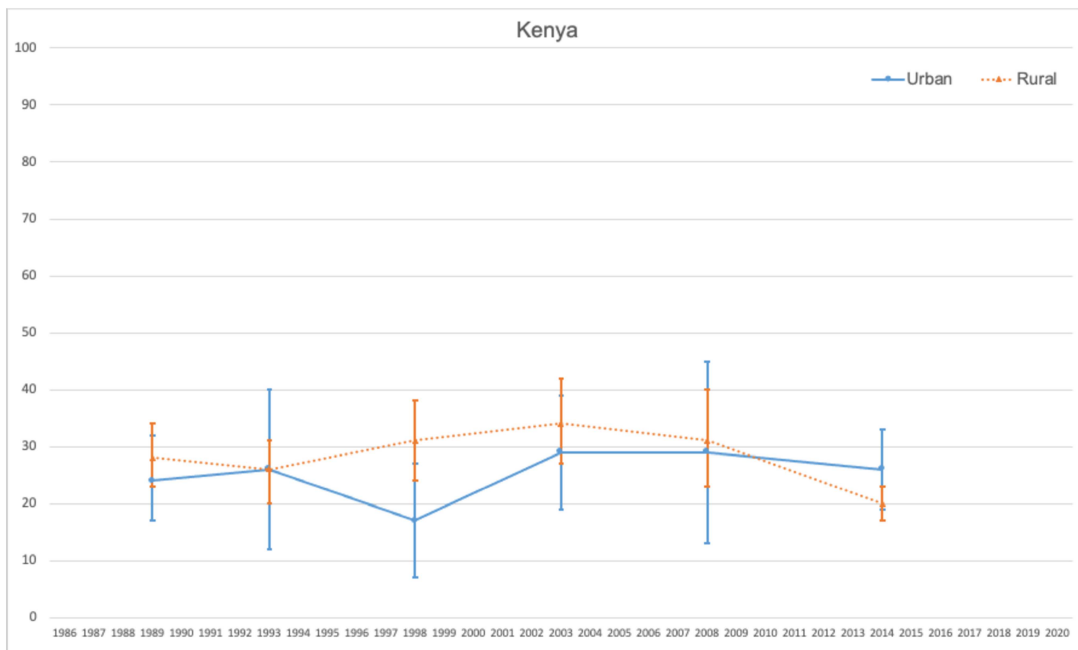

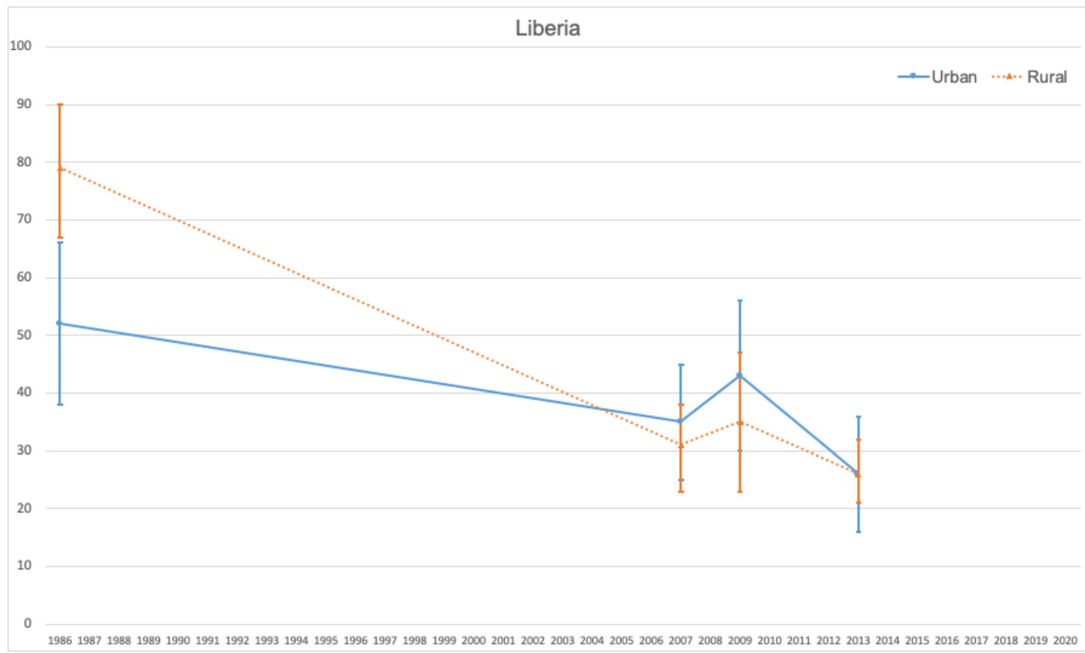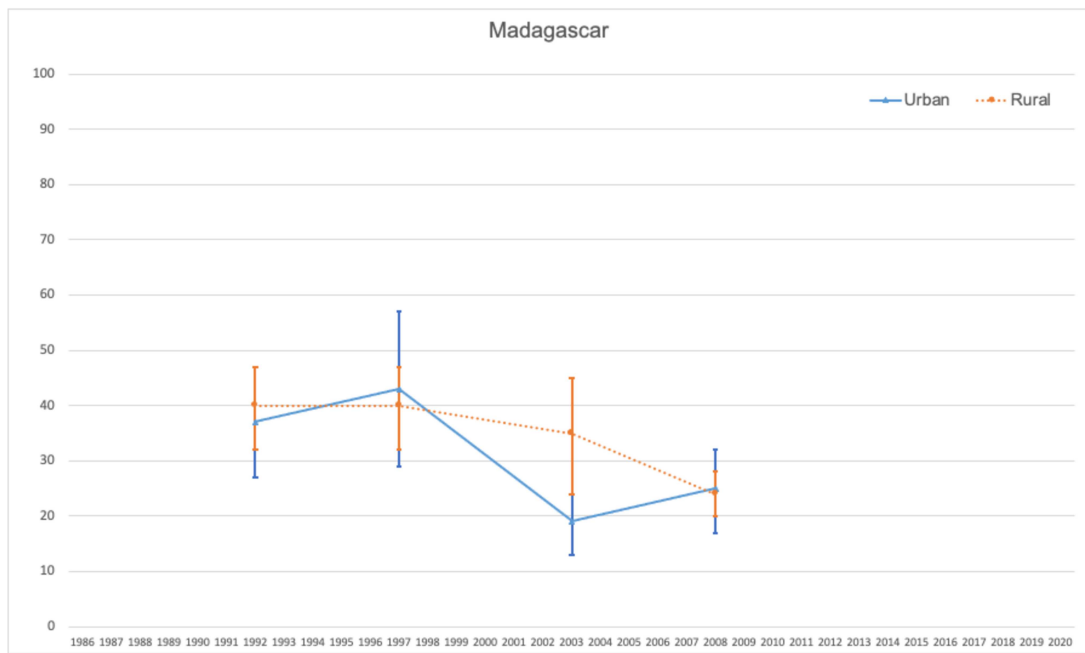

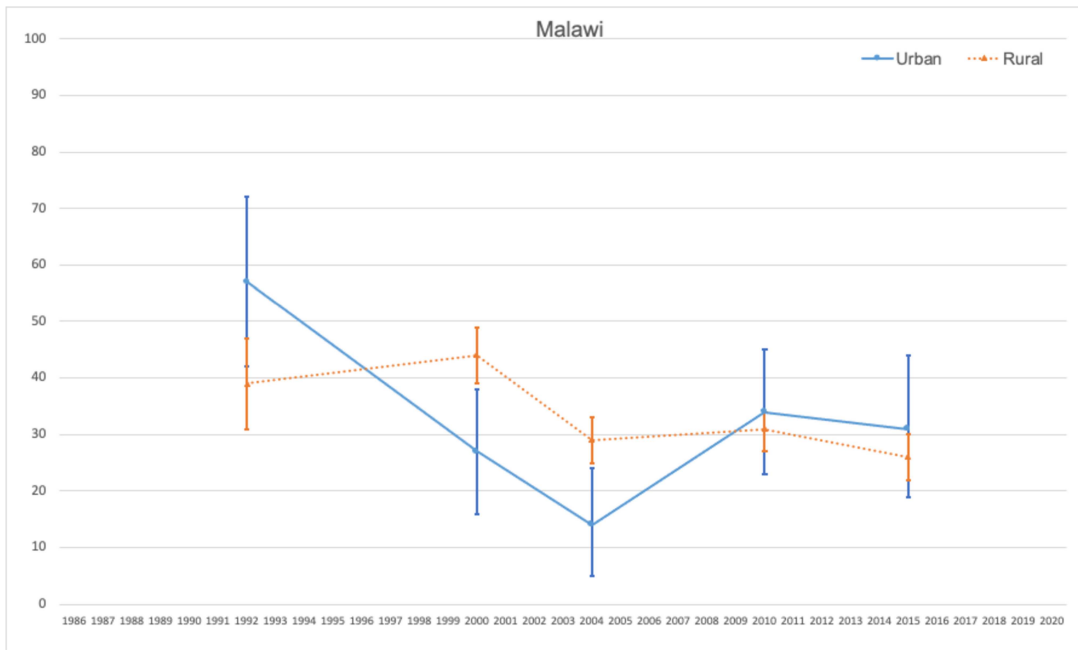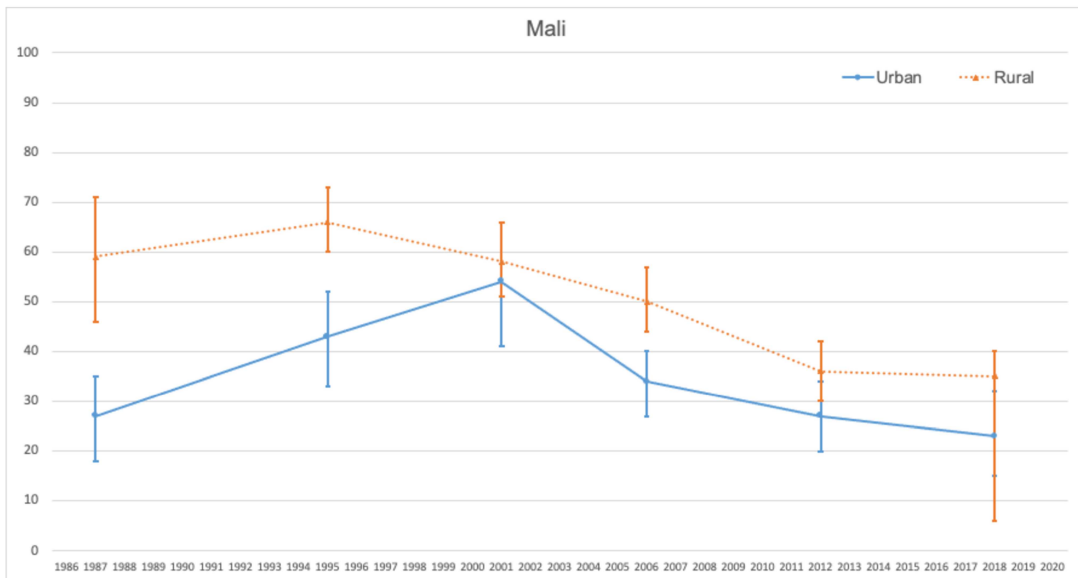

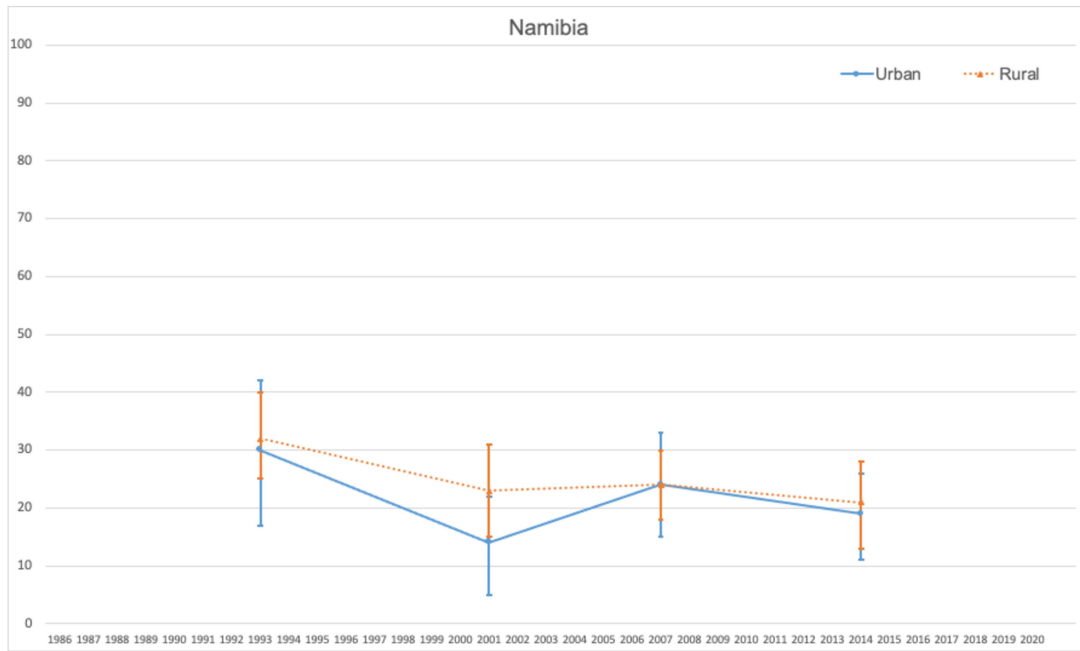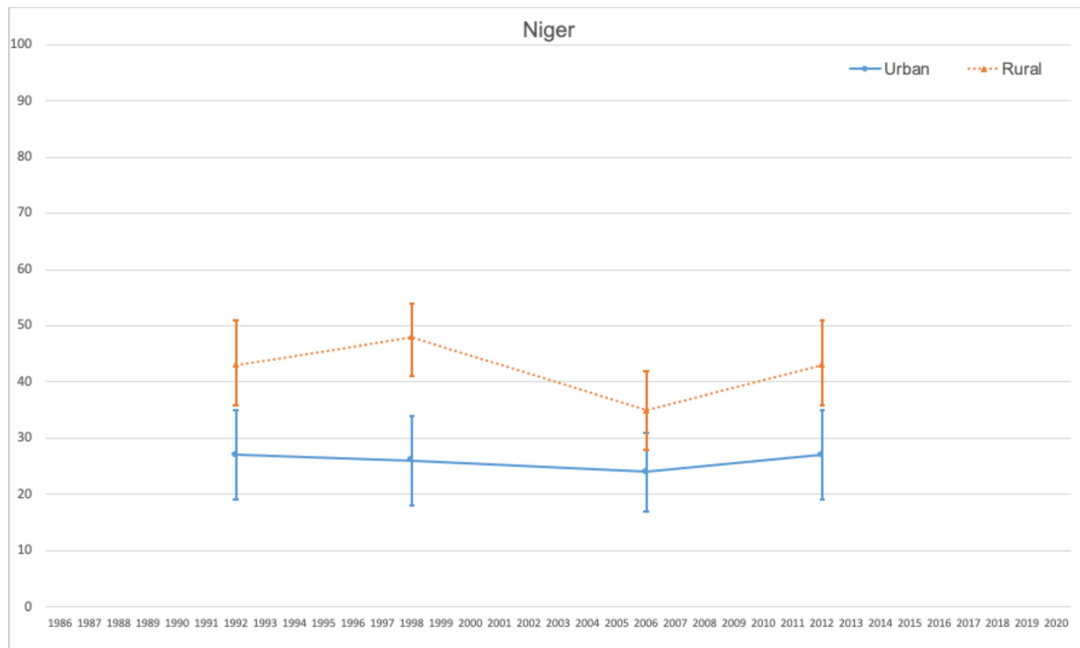

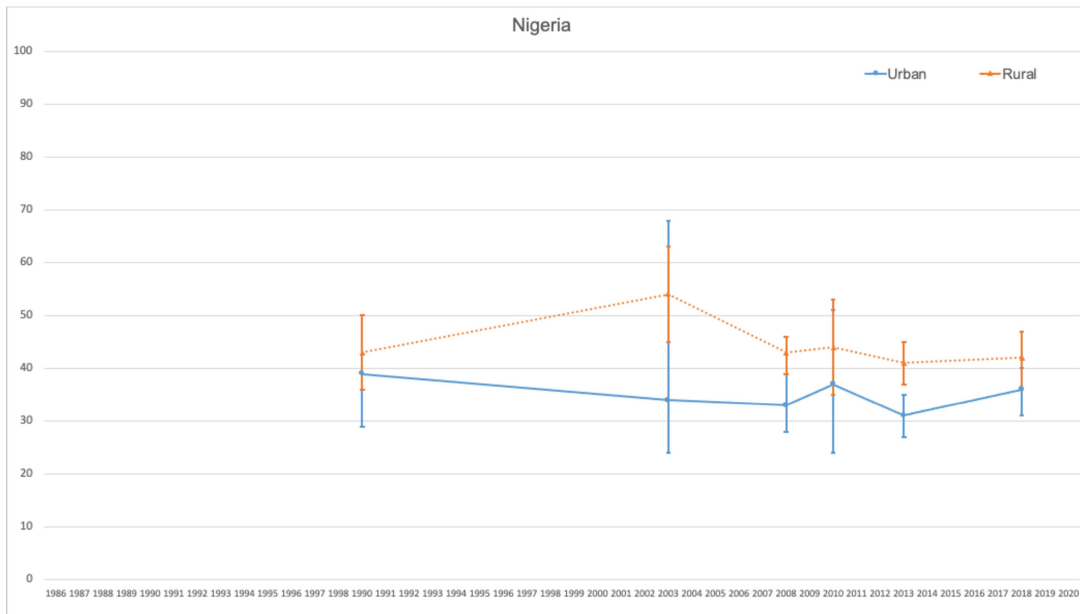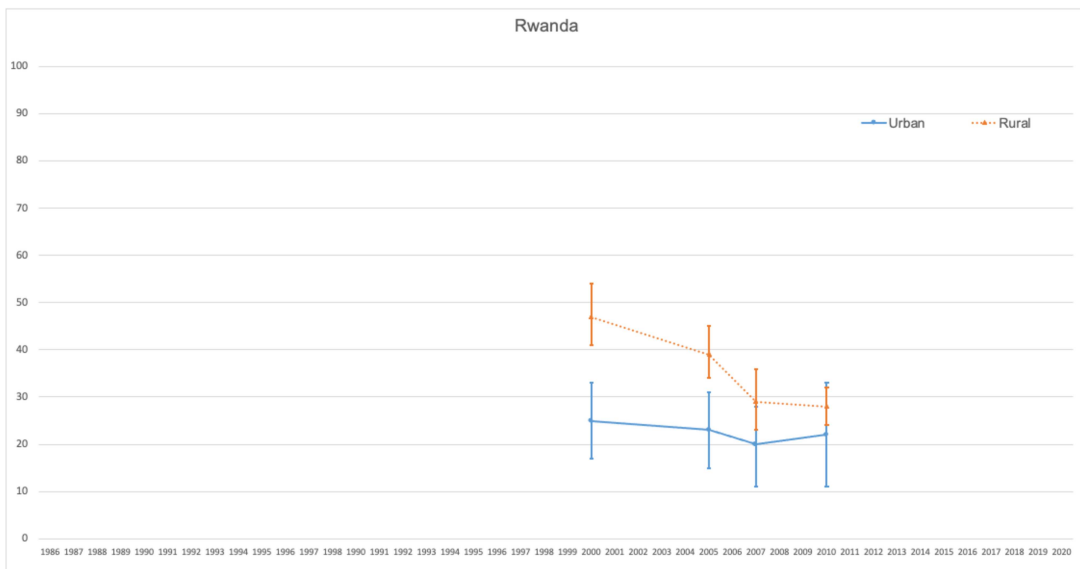



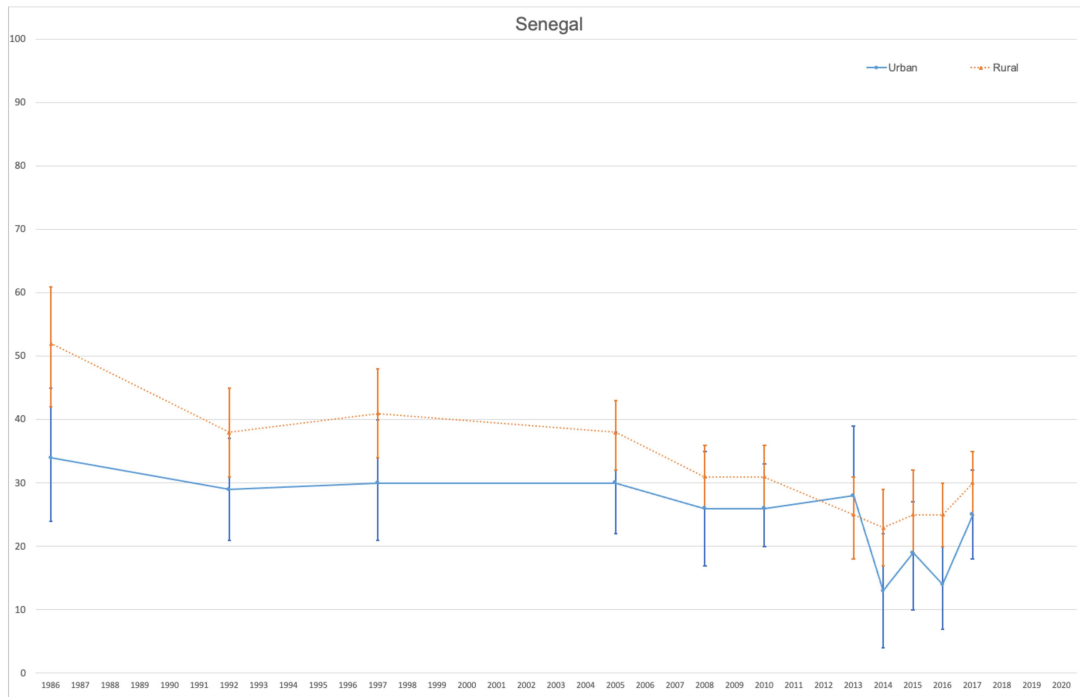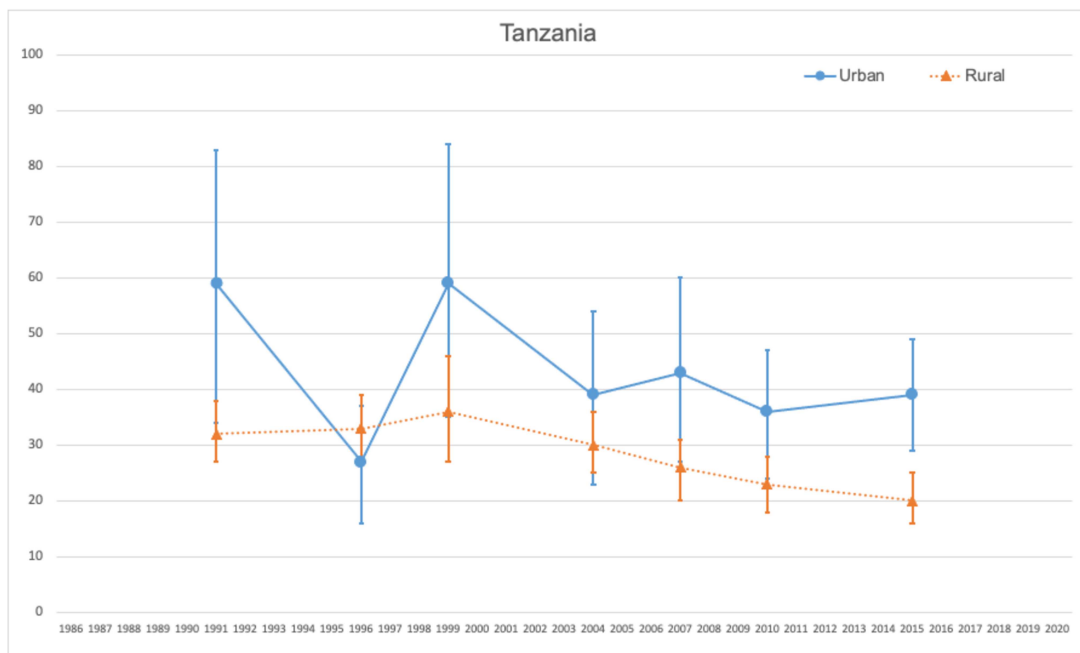

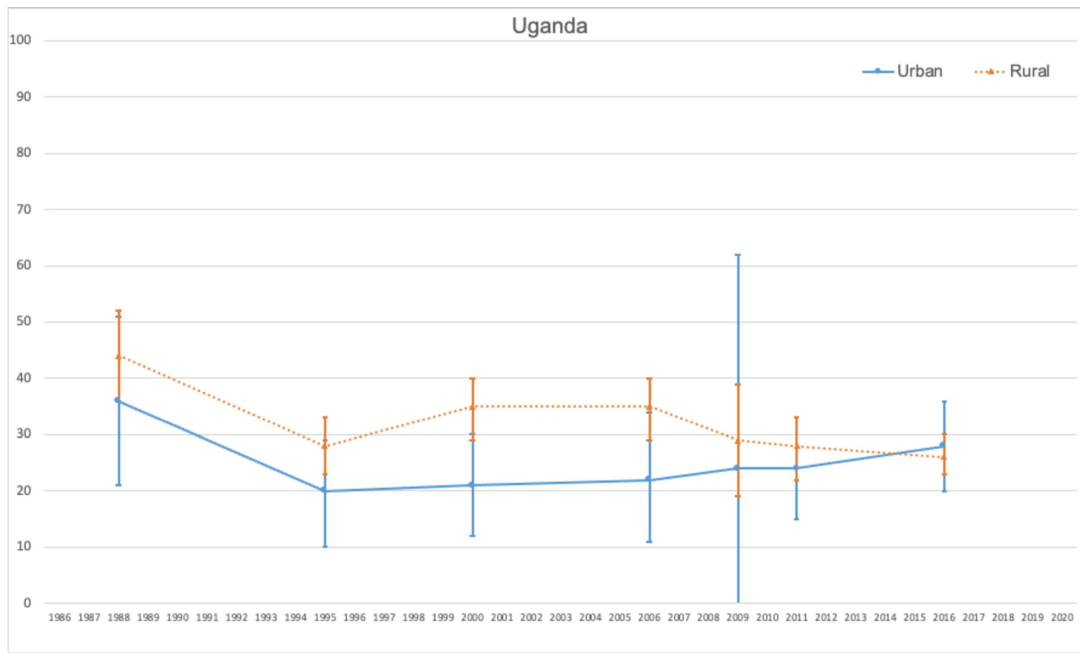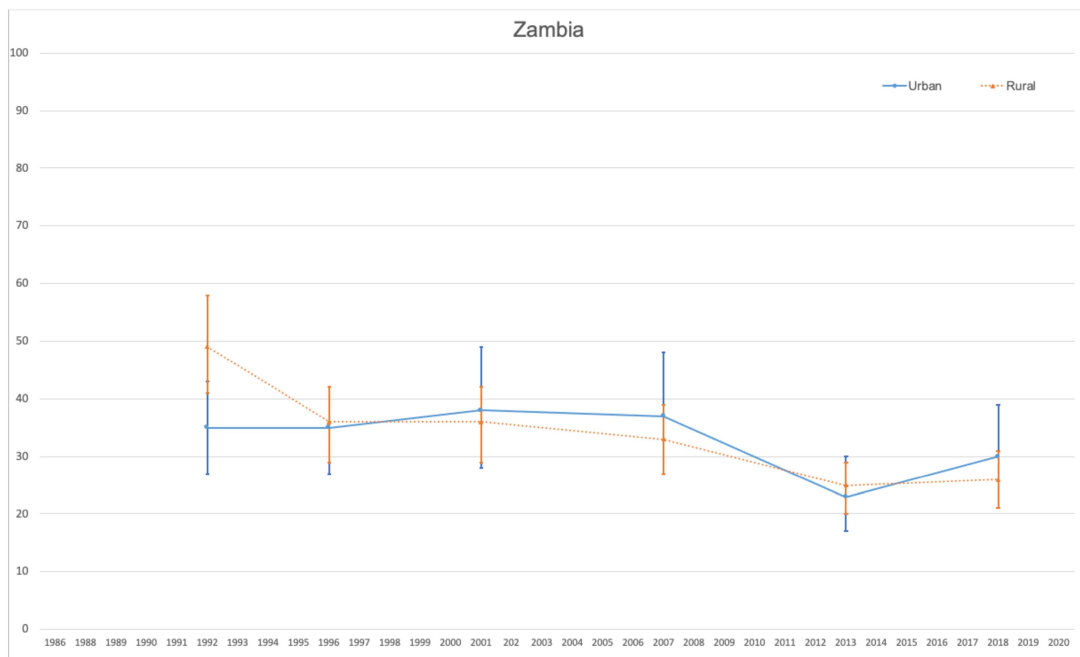

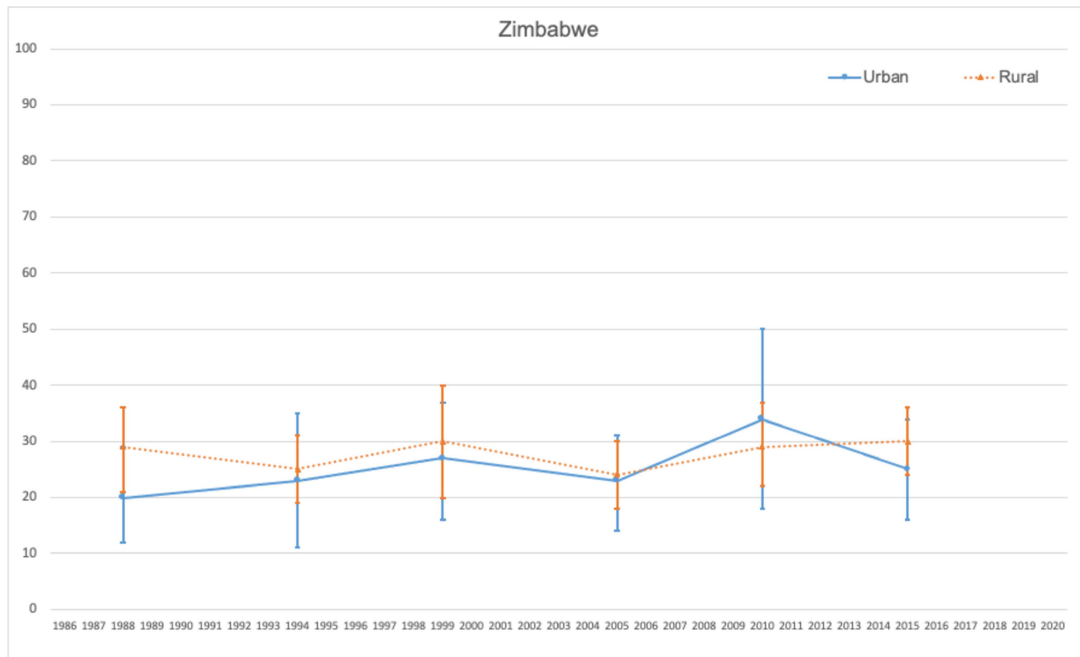

Supplement: bmjgh-2021-007544supp001.pdf [file bmjgh-2021-007544supp001.pdf]
